# Supplementary material for: Gut-Thyroid axis: How gut microbial dysbiosis associated with euthyroid thyroid cancer
Source: PubMed Central journal article supplement (PMC8990431; doi:10.7150/jca.66816), 2022-03-28
Supplement: jcav13p2014s1.pdf [file jcav13p2014s1.pdf]

**Supplementary Information**

**Table S1. Serum thyroid antibodies and hormone in euthyroid thyroid cancer patients.**

| <b>Patients</b> | <b>Age/Gender</b> | <b>T3<br/>(ng/ml)</b> | <b>T4<br/>(µg/dl)</b> | <b>FT3<br/>(pmol/L)</b> | <b>FT4<br/>(pmol/L)</b> | <b>TSH<br/>(µIU/ml)</b> | <b>Anti-TPO<br/>(U/ml)</b> | <b>Anti-TG<br/>Ab(%)</b> | <b>TM-Ab<br/>(IU/L)</b> | <b>Type of Thyroid<br/>Cancer</b> |
|-----------------|-------------------|-----------------------|-----------------------|-------------------------|-------------------------|-------------------------|----------------------------|--------------------------|-------------------------|-----------------------------------|
| 1               | 38/Female         | 0.85                  | 8.09                  | 5.19                    | 15.90                   | 2.81                    | <15.0                      | 1.22                     | 2.21                    | Papillary Thyroid cancer          |
| 2               | 35/Female         | 1.25                  | 8.23                  | 4.67                    | 11.88                   | 2.07                    | <15.0                      | 4.06                     | 1.10                    | Papillary Thyroid cancer          |
| 3               | 48/Male           | 0.95                  | 5.90                  | 4.30                    | 12.70                   | 1.90                    | <15.0                      | 3.03                     | 2.70                    | Papillary Thyroid cancer          |
| 4               | 50/Female         | 0.92                  | 7.30                  | 6.26                    | 13.12                   | 3.20                    | 12                         | 2.30                     | 3.40                    | Papillary Thyroid cancer          |
| 5               | 40/Male           | 0.83                  | 7.40                  | 3.70                    | 12.30                   | 1.80                    | 10                         | 3.40                     | 1.92                    | Papillary Thyroid cancer          |
| 6               | 30/Male           | 0.97                  | 6.70                  | 5.15                    | 11.10                   | 1.70                    | 8                          | 4.20                     | 2.20                    | Papillary Thyroid cancer          |
| 7               | 43/Female         | 1.30                  | 7.70                  | 4.40                    | 13.20                   | 1.94                    | 7                          | 2.70                     | 1.75                    | Papillary Thyroid cancer          |
| 8               | 46/Female         | 0.97                  | 6.30                  | 6.10                    | 12.50                   | 2.60                    | 9                          | 3.20                     | 1.60                    | Papillary Thyroid cancer          |
| 9               | 49/Male           | 1.20                  | 8.20                  | 4.13                    | 14.50                   | 1.97                    | 6                          | 2.90                     | 1.70                    | Papillary Thyroid cancer          |
| 10              | 33/Female         | 0.97                  | 7.30                  | 3.90                    | 11.70                   | 1.95                    | 11                         | 3.70                     | 1.60                    | Follicular Thyroid cancer         |
| 11              | 42/Female         | 0.94                  | 8.30                  | 3.95                    | 11.30                   | 2.09                    | 9                          | 1.70                     | 1.90                    | Papillary Thyroid cancer          |
| 12              | 36/Male           | 0.95                  | 7.90                  | 5.30                    | 13.70                   | 2.10                    | 6                          | 1.80                     | 1.40                    | Papillary Thyroid cancer          |
| 13              | 31/Female         | 1.10                  | 8.06                  | 5.10                    | 12.10                   | 2.32                    | 7                          | 3.60                     | 2.10                    | Follicular Thyroid cancer         |
| 14              | 47/Male           | 1.11                  | 6.94                  | 3.40                    | 12.30                   | 2.30                    | 7                          | 1.80                     | 2.11                    | Follicular Thyroid cancer         |
| 15              | 39/Male           | 1.12                  | 7.45                  | 3.90                    | 14.30                   | 2.23                    | 5                          | 2.55                     | 1.96                    | Papillary Thyroid cancer          |
| 16              | 37/ Male          | 0.94                  | 8.07                  | 4.23                    | 11.70                   | 1.98                    | 6                          | 2.10                     | 1.30                    | Papillary Thyroid cancer          |

**Table S2. Serum thyroid antibodies and hormone in healthy subjects.**

| <b>Control</b> | <b>Age/Gender</b> | <b>T3<br/>(ng/ml)</b> | <b>T4<br/>(µg/dL)</b> | <b>FT3<br/>(pmol/L)</b> | <b>FT4<br/>(pmol/L)</b> | <b>TSH<br/>(µIU/ml)</b> | <b>Anti-TPO<br/>(U/ml)</b> | <b>Anti-TG<br/>Ab(%)</b> | <b>TM-Ab<br/>(IU/L)</b> |
|----------------|-------------------|-----------------------|-----------------------|-------------------------|-------------------------|-------------------------|----------------------------|--------------------------|-------------------------|
| 1              | 35/Female         | 1.09                  | 7.11                  | 4.14                    | 12.1                    | 1.96                    | Negative                   | Negative                 | Negative                |
| 2              | 41/Female         | 0.99                  | 5.31                  | 3.67                    | 13.31                   | 1.21                    | Negative                   | Negative                 | Negative                |
| 3              | 40/Male           | 1.08                  | 4.21                  | 3.88                    | 14.23                   | 1.86                    | Negative                   | Negative                 | Negative                |
| 4              | 36/Male           | 0.91                  | 4.32                  | 3.63                    | 9.19                    | 2.12                    | Negative                   | Negative                 | Negative                |
| 5              | 38/Male           | 0.94                  | 6.12                  | 5.11                    | 15.12                   | 1.37                    | Negative                   | Negative                 | Negative                |
| 6              | 49/Female         | 1.13                  | 5.61                  | 4.23                    | 11.13                   | 1.98                    | Negative                   | Negative                 | Negative                |
| 7              | 50/Male           | 0.91                  | 5.82                  | 5.15                    | 10.16                   | 3.13                    | Negative                   | Negative                 | Negative                |
| 8              | 45/Female         | 0.89                  | 6.42                  | 4.14                    | 14.17                   | 2.51                    | Negative                   | Negative                 | Negative                |
| 9              | 37/Female         | 0.88                  | 4.65                  | 3.67                    | 13.19                   | 3.23                    | Negative                   | Negative                 | Negative                |
| 10             | 43/ Male          | 0.92                  | 5.71                  | 6.18                    | 11.41                   | 2.45                    | Negative                   | Negative                 | Negative                |
